# Supplementary material for: Differentiation of primary and secondary marine organic aerosol with machine learning
Source: Copernicus journal article supplement (doi:10.5194/egusphere-2025-1415), 2025-04-14
Supplement: Supplementary file [file egusphere-2025-1415-AC2-supplement.pdf]

We thank the referees for their thoughtful and constructive comments. Please find the detailed response to each comment, including text changes to the manuscript. Our response is in blue font while changes to the manuscript are underlined. The line numbers used here refer to those in the change-tracked manuscript file.

## Reviewer #2

### Overview and recommendations

Chen et al., 2025 provides a technique for estimating marine POA by using a machine learning technique to estimate marine SOA. I found the layout and logic in this study confusing and hard to follow at times. My interpretation of the work is that ML was used to predict marine SOA, and then  $POA = OA - SOA$ . But the authors focused on filtering the data down to periods in which marine SOA were most likely and little marine POA was predicted during these times. It was not clear to me whether this was used to train the model and that then the model was applied to the whole time period, or if the model was only used in these highly filtered times. If the latter case (seems unlikely!), then the ML work seems unnecessary. I've tried to point out where I found the methods and application confusing in my comments below. I do think that if the authors can make their intent and applicability of methods more clear that this study could be published in EGU sphere.

Response: We thank the reviewer for the comments and tried our best to clarify the concerns, point-by-point response is below.

### Major comments

Why did the authors choose to predict SOA with the ML model, rather than POA? Neither seems inherently correct or incorrect but the logic should be explained.

Response: We thank the reviewer for pointing this critical issue. We choose to predict the SOA because there are some variables is more related to secondary production processes. As for the POA production, less is known about its emission strengthen, source regions etc.

We have now included the following statement in the revised manuscript.

Line 106: "marine SOA was chosen as the ML model predictor, because SOA is expected to be impacted by environmental factors and less is known about POA, emission strengthen and source regions."

Line 85: Downscaling hourly meteorological measurements to 10 minutes could introduce significant bias to the study, depending on how sensitive the ML predictions were to the various met parameters. Were any sensitivity studies

performed on this assumption? Can the authors comment on any potential limitations from this assumption?

Response: We thank the reviewer for this critical technical point. We have conducted additional sensitivity test for the meteorological downscaling. We test different downscaling techniques, including using hourly average values, linear downscaling.

As shown in Figure below, using different interpolation techniques introduces minor bias to the POA results.

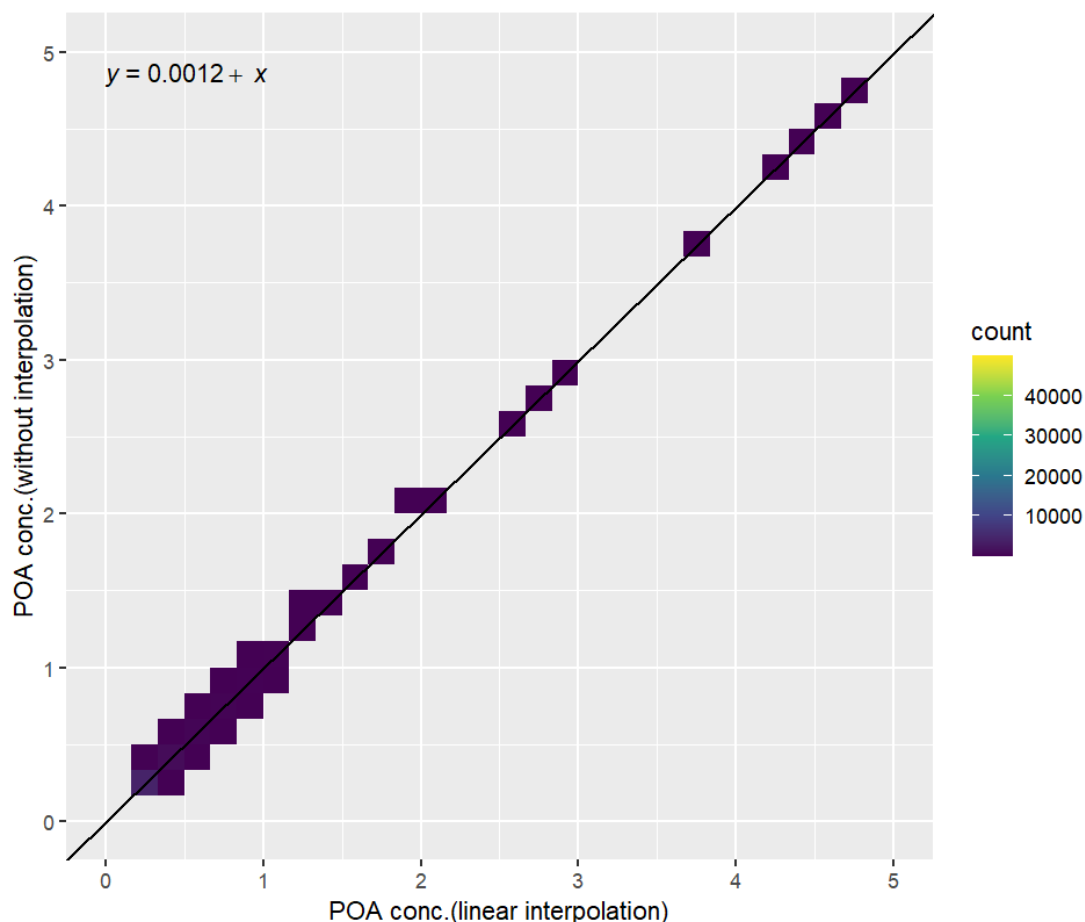

Figure R1. POA concentration using linear interpolated meteorology data versus POA concentration using hourly average meteorology data.

Sect 2.2 The filtering processes don't make sense how they're presented - for example the paragraph that begins "We then applied additional filtering processes to reduce the impact of POA production..." If this study is intended to use ML to predict SOA and then obtain POA via  $POA = OA - SOA$ ....then what is done for the periods that are filtered out to exclude POA production times? Are those times assumed to be POA only or just removed from the dataset? Basically overall, this section reads as "We find the periods of time in which SOA is most likely and then predict POA from

that ." Which then begs the question - wouldn't POA be very low and why is a ML model needed? Presumably this is not the authors' intent so clarity is needed throughout this section. Perhaps once SOA is quantified in the "SOA-only" times, then the authors deploy their methods to the whole data set?

Response: We thank the reviewer for rising this important point. The ML-model was trained using SOA-only periods and then applied to whole dataset, the anomaly between predicted SOA and measured OA is then attributed to marine POA. We have now included additional statement in the revised manuscript for clarity:

Line 141: "Finally, the ML method was applied on the clean marine air masses data to predict marine SOA concentrations...."

Assuming that the authors trained the model on SOA production periods only and then applied the model to the whole dataset - have similar aerosol/ML studies been performed? Does it seem valid that the model can easily sort out anthropogenic influences to correctly predict marine SOA (mSOA) and therefore mPOA? Another way of asking this question is: what happened to the time periods with anthropogenic influence? How is the model supposed to know that everything that is not mSOA could be a mixture of mPOA and aSOA/aPOA? Again, what portions of the dataset were used needs to be clarified throughout.

Response: Indeed, similar aerosol/ML studies have been performed. For example, Lei et al. (ACS ES&T Air 2025), trained a ML model strictly on local-emission dominated events and applied the ML on whole dataset to distinguish between local and regional transport.

It has to be noted that the model does not sort out anthropogenic influences. We have utilized MHD clean sector criteria to the data to ensure minimum influence from anthropogenic influences. The time periods with anthropogenic influences were removed from further analysis. However, we expected that it is possible to train an additional anthropogenic OA model to further expand the approach.

We have included the following statement in the revised manuscript:

Line 141: "Finally, the ML method was applied on the clean marine air masses data to predict marine SOA concentrations...."

Line 155 - the SVR model is used to predict OA. I thought that OA was available via AMS data, and that the model is being used to predict SOA to find POA.

Response: The reviewer is correct; we have revised the statement for clarity.

Line 179: demonstrating the model's accuracy in predicting total OA (SOA + POA-bg) concentration using the selected predictors.

Line 181

Section 3.3 - I'm confused where the  $k_{\text{HTDMA}}$  and spread values come from. Is this from the observations? The ML model? Other? This section seems somewhat out of place at the moment.

Response: As stated in the  $k_{\text{HTDMA}}$  were obtained using a humidified tandem differential mobility analyzer. The detailed description has been included in the revised manuscript.

The humidified tandem differential mobility analyzer (HTDMA) (Swietlicki et al., 2000) was used to measure aerosol hygroscopic growth at a fixed relative humidity of 90% for aerosol with selected dried sizes of 35, 50, 75, 110, and 165 nm. The growth factors measured by HTDMA were inverted using a piecewise linear function (Gysel et al., 2009).

$$GF_{mean}^{a,b} = \frac{1}{nf^{a,b}} \int_a^b GF \ c(GF, D) dGF$$

The arithmetic mean GF ( $GF_{mean}$ ) was calculated as:

$$GF_{mean} = \int GF \ c(GF, D) dGF$$

To quantify the mixing state, the GF spread factor (SF), defined as the standard deviation of the GF-PDF divided by the  $GF_{mean}$ , was calculated as:

$$SF = \frac{\left( \int_0^\infty (GF - GF_{mean})^2 \ c(GF, D) dGF \right)^{1/2}}{GF_{mean}}$$

The GF was measured at 90% RH, however, the RH of the second DMA fluctuated slightly with the ambient temperature. The data between 88-92% RH were corrected using the  $\kappa$ -Köhler theory according to formula derived from Petters and Kreidenweis (2007):

$$\kappa = \frac{(GF^3 - 1)(1 - a_w)}{a_w} \rightarrow GF(a_w, \kappa) = \left( 1 + \kappa \frac{a_w}{1 - a_w} \right)^{1/3}$$

where  $a_w$  is the water activity, and obtained by Köhler theory:

$$a_w = \frac{RH}{\exp\left(\frac{4\sigma_s v_w}{RTD}\right)}$$

Where  $\sigma_s$  is the surface tension of the droplet,  $v_w$  is the partial molar volume of water, R is the universal gas constant, T is the temperature, and D is the diameter of the droplet. The surface tension is assumed to be  $0.072 \text{ mN m}^{-1}$ .

We believe the inclusion of HTDMA data analysis is useful as it is related to marine aerosol-cloud interaction, which is associated with the climate impact of both marine POA and SOA.

#### **Minor comments**

The introduction refers to numerous marine studies but does not provide any geographical context to any of them. It would be helpful to understand to what regions each studies' conclusions are most likely appropriate to.

Response: We thank the reviewer for pointing this out. Marine aerosols indeed have shown a large geographical heterogeneity. We have now included more details on regional specific studies.

Line 36: Ovadnevaite et al. (2011a) documented a marine POA plume with a peak POA concentration of up to  $3.8 \mu\text{g m}^{-3}$  in Northeast Atlantic,

Line 46: O'Dowd et al. (2015) observed significant changes in the CCN activities of sea spray aerosol during a phytoplankton plume over Northeast Atlantic, whereas Quinn et al. (2014) and Bates et al. (2020) reported no substantial alterations in CCN activity over Northwest Atlantic.

Lines 78-79: Please note what was used to provide meteorological conditions.

Response: The source of meteorological conditions is now implemented.

Line 101-110: Please provide citations for the assertions about SVR's skills and merits.

Response: Thanks for your comment. The references have been added, and the relevant details are provided below.

SVR was chosen for its generalizability in handling small datasets and its resistance to overfitting (Ghimire et al., 2022; Juang and Hsieh, 2009). Unlike tree-based models like random forest (Breiman, 2001), SVR model can predict continuous values (Ma et al., 2003; Tang et al., 2024). The hyperparameters, including the penalty coefficient (C) and gamma ( $\gamma$ ) of the Radial Basis Functions (RBF) kernel were tuned via grid search. The model targeted OA concentration, using  $\text{nss-SO}_4$ , MSA,  $\text{NH}_4$ , and meteorological parameters (temperature, relative humidity, boundary layer height, wind direction, and pressure) as predictors. We also included hours of the day to capture diurnal variations. Predictors not directly linked to secondary production, e.g., sea salt,  $\text{NO}_3$ , and BC, are excluded to avoid over-fitting and ensure generalizability, even though including these might have enhanced the model performance in the training dataset. Wind speed was used to select the SOA production period, therefore, it was not suitable as a predictor. A summary of the variables employed as predictors is shown in Table 1. The SVR were trained using ‘tidymodel 1.3.0’ framework using R programming software (version 4.4.3).

## Reference

- Breiman, L.: Random Forests, Machine Learning, 45, 5–32, <https://doi.org/10.1023/a:1010933404324>, 2001.
- Ghimire, S., Bhandari, B., Casillas-Pérez, D., Deo, R. C., and Salcedo-Sanz, S.: Hybrid deep CNN-SVR algorithm for solar radiation prediction problems in Queensland, Australia, Engineering Applications of Artificial Intelligence, 112, 104860, <https://doi.org/10.1016/j.engappai.2022.104860>, 2022.
- Juang, C.-F. and Hsieh, C.-D.: TS-fuzzy system-based support vector regression, Fuzzy Sets and Systems, 160, 2486–2504, <https://doi.org/10.1016/j.fss.2008.11.022>, 2009.
- Ma, J., Theiler, J., and Perkins, S.: Accurate On-line Support Vector Regression, Neural Computation, 15, 2683–2703, <https://doi.org/10.1162/089976603322385117>, 2003.
- Tang, D., Zhan, Y., and Yang, F.: A review of machine learning for modeling air quality: Overlooked but important issues, Atmospheric Research, 300, 107261, <https://doi.org/10.1016/j.atmosres.2024.107261>, 2024.

Line 113: please explain why 2015 was used; are there any indicators that POA and SOA could or could not have shifted in any way over the entire time period (2009–2018)? For example, given that 27.8% of SOA periods happened in the 4-year challenge period (2015–2018) but this period represents ~44% of the total time, that seems like it could indicate that a change in aerosol balance between POA and SOA may have occurred over the time period. Did the authors attempt using data from each year in the training and challenge datasets as a sensitivity study?

Response: The year 2015 was randomly selected. We have not noticed any shift for the entire time periods.

We now included leave-one-year-out cross validation to identify any shift over the entire data periods. As shown in the figure R2 below.

The model performances on each year are similar, indicating minimum shift over the period.

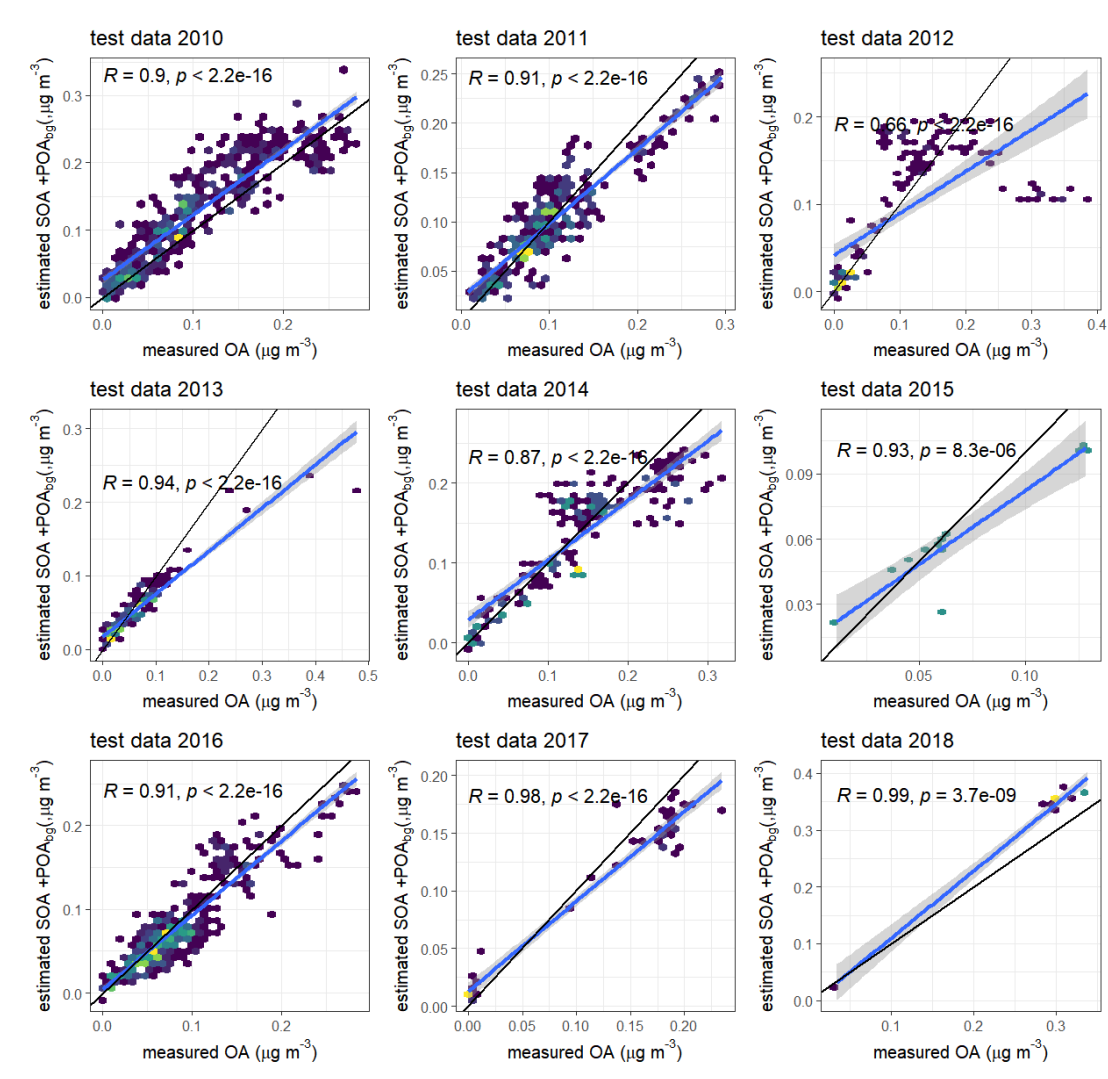

Figure R2. Measured OA versus estimated OA (SOA +POA<sub>bg</sub>) for each year using other years as training dataset.

Figure 2 - is the y-axis mislabeled? Isn't it predicted SOA + POA\_bg?

Response: We thank the reviewer for pointing this out, the y-axis label has been corrected.

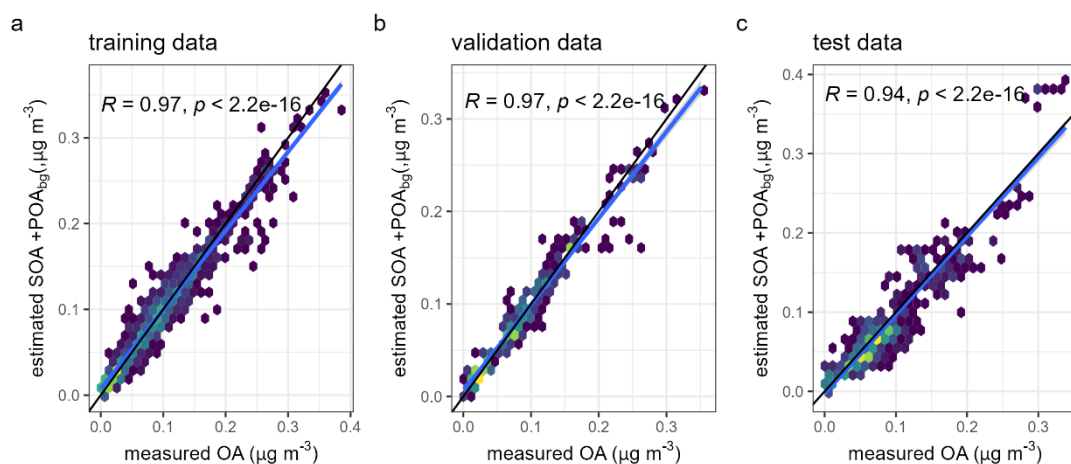

[Figure R3. Observed OA versus predicted \(SOA +POA<sub>bg</sub>\) for \(a\) training, \(b\) validation and \(c\) test datasets. Data density is illustrated using a color gradient with darker colour indicating lower data density. Black lines denote the 1:1 correspondence lines, blue lines represent regression lines.](#)

Line 172 - 183 and Figure S5: Figure S5 would be more meaningful with an indication of % of data points the y axis represents. Having 25,000 negative values as the optimal POA<sub>bg</sub> assumption still seems quite large. Why are there so many negative values - is this to be expected with the ML methods deployed? How were the negative values handled?

[Response: We thank the reviewer for pointing this out. As shown in the Figure below, the percentage number with negative values are lower than 6%. The negative values from originated from the uncertainty of the machine learning model and measurement. Nevertheless, the negative values were mainly found in winter time, in which the POA and SOA concentrations were too low to have any significant climate impacts.](#)



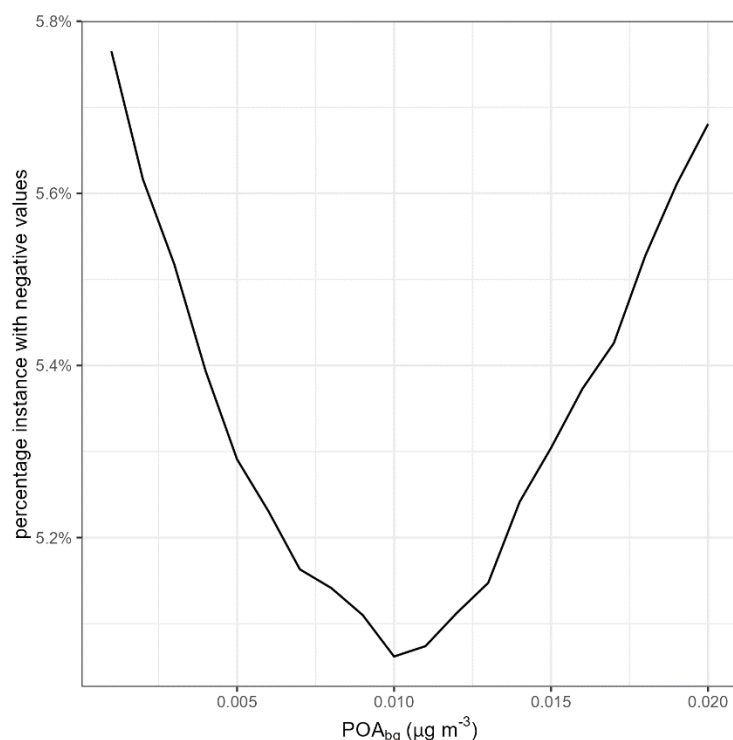

Figure R4. The different POA<sub>bg</sub> value used in ML model and the percentage of non-physical prediction instance including POA and SOA (lower than 0). This indicates the POA<sub>bg</sub> of 0.01 μg m<sup>-3</sup> is the optimum value.

### Technical comments

Line 16-17: “...introduce a machine learning approach to differentiate and quantify the contribution of marine POA from marine secondary organic aerosol (SOA).” - the phrasing here makes it sound like the team is quantifying the contribution of POA that is formed from SOA. Suggest rephrasing (something like quantify the contribution of marine POA to total OA).

Response: The sentence has been rephrased: “...introduce a machine learning approach to ~~differentiate and quantify the contribution of~~ distinguish between marine POA and marine secondary organic aerosol (SOA).”

Line 89: MHD - I assume the Mace Head site? Please be sure to define.

Response: Mace Head site defined in the revised manuscript.

Line 120 - please provide reference for FCM

Response: Reference included:

Bezdek, J. C., Ehrlich, R., and Full, W.: FCM: The fuzzy c-means clustering algorithm,

Computers & Geosciences, 10, 191–203, [https://doi.org/10.1016/0098-3004\(84\)90020-7](https://doi.org/10.1016/0098-3004(84)90020-7), 1984.

Line 139 - “periods” not “period”

Response: Corrected.

Throughout the manuscript (including figures) the authors refer to “train” or “training” data - I

believe training is more typically used. Please use one or the other throughout.

Response: We have now revised the terminology to ‘training’.

### **Figures and Tables**

Please provide in the SI a key for the abbreviations used on Figures S1, S2 and elsewhere (e.g. bih, rhum...)

Response: The abbreviation table has been included in Table 1.
